# Supplementary material for: Enhancing the electrochemical performance of a micron-sized Ge anode through in situ surface composite flower-like Zn2GeO4 for Li-ion batteries
Source: Royal Society of Chemistry journal article supplement (doi:10.1039/d2se00795a), 2022-01-01
Supplement: d2se00795a1.pdf [file d2se00795a1.pdf]

## Enhancing electrochemical performance of micron size Ge anode through in-situ surface composite flowerlike $Zn_2GeO_4$ for Li ion batteries

Jian Hao<sup>a\*</sup>, Jun Bai<sup>a</sup>, Jing Wang<sup>a</sup>, Lu Xu<sup>a</sup>, Junli Guo<sup>b</sup>, Caixia Chi<sup>c</sup>, Haihong Li<sup>d</sup>

<sup>a</sup> State Key Laboratory of High-efficiency Utilization of Coal and Green Chemical Engineering, College of Chemistry & Chemical Engineering, Ningxia University, Yinchuan 750021, China, E-mail: haojian2017@126.com.

<sup>b</sup> College of Mechanical Engineering, Ningxia University, Yinchuan 750021, China.

<sup>c</sup> Food and Pharmaceutical Engineering College, Suihua University, Suihua 152061, China.

<sup>d</sup> The Chemical Engineering Department, Hulunbuir Vocational Technical College, Hulunbuir, Inner Mongolia 021000, China.

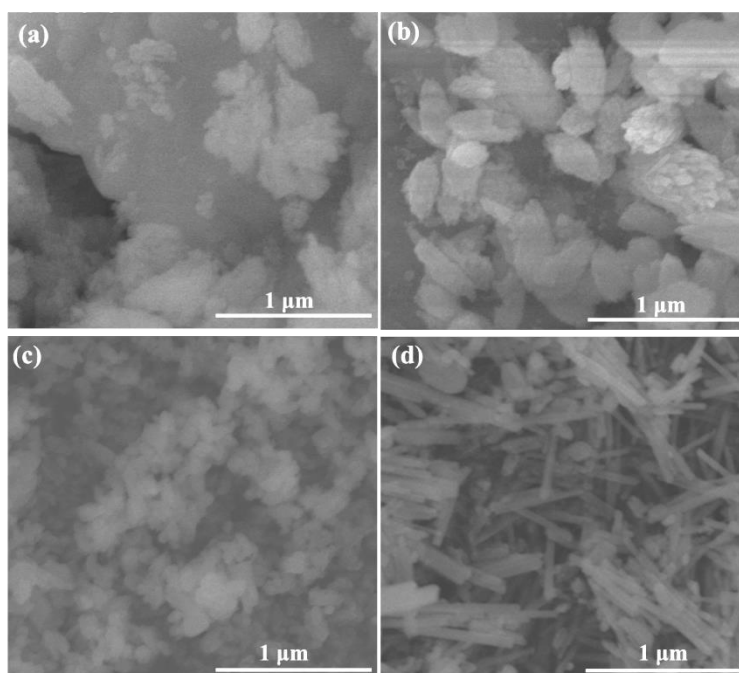

Fig S1 Detailed morphology of samples, in EDTA:water=1:1 solvent system without NaOH(a), in EDTA:water=1:2 solvent system the without NaOH(b), in

EDTA:water=1:1 solvent system the with 1ml NaOH(c), and in EDTA:water=1:1 solvent system the with 2ml NaOH(d).

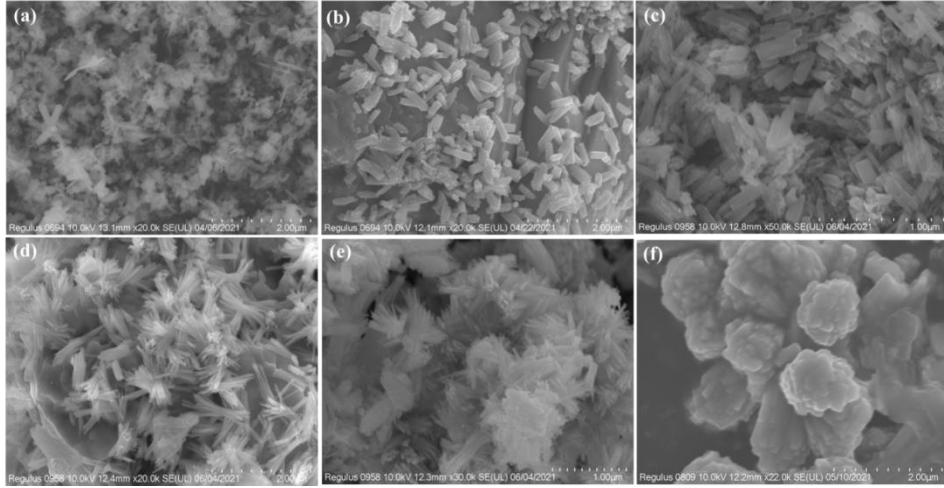

Fig.S2 SEM images of Ge/Zn<sub>2</sub>GeO<sub>4</sub> products obtained at different reaction temperatures: (a) 120 °C, (b) 140 °C, (c) 160 °C, (d) 180 °C, (e) 200 °C, and (f) 220 °C.

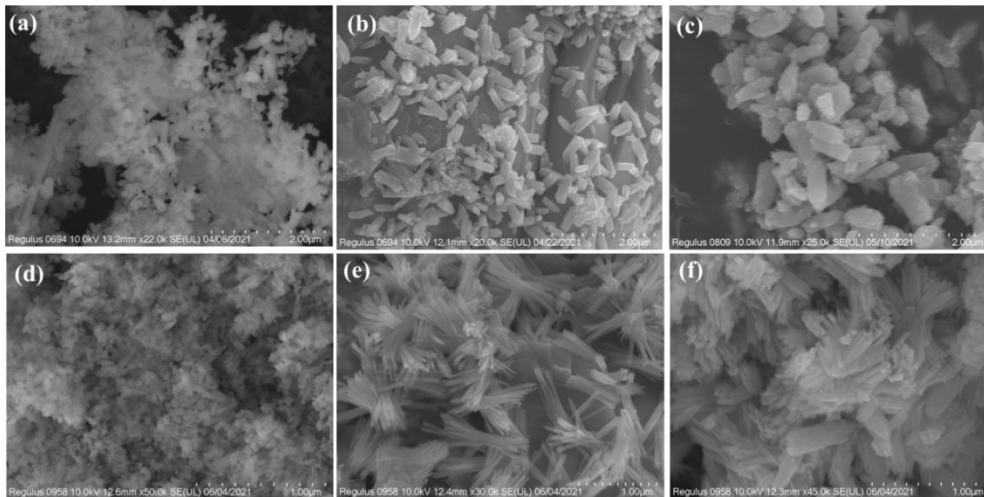

Fig.S3 SEM images of Ge/Zn<sub>2</sub>GeO<sub>4</sub>-140 °C with different reaction times, (a) 12h, (b) 24h, (c) 48h, and Ge/Zn<sub>2</sub>GeO<sub>4</sub>-180 °C with different reaction times, (d) 12h, (e) 24h, (f) 48h.

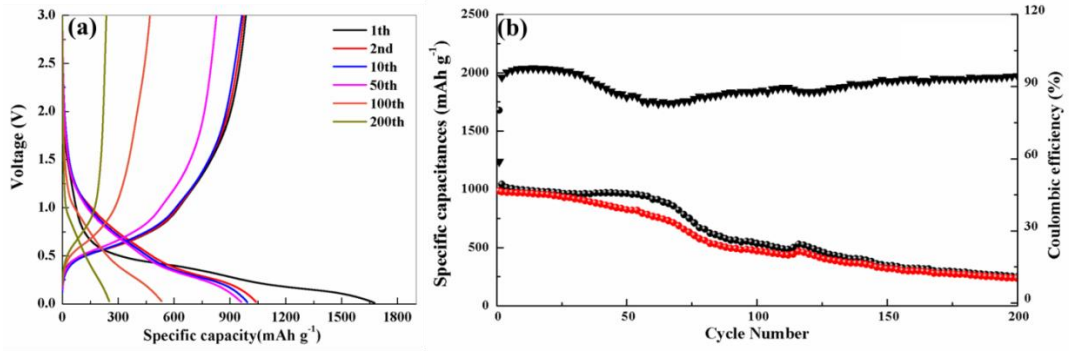

Fig.S4 Galvanostatic charge-discharge profiles for different cycles (a), and cycling performance and Coulombic efficiency (b) of micron Ge electrode.

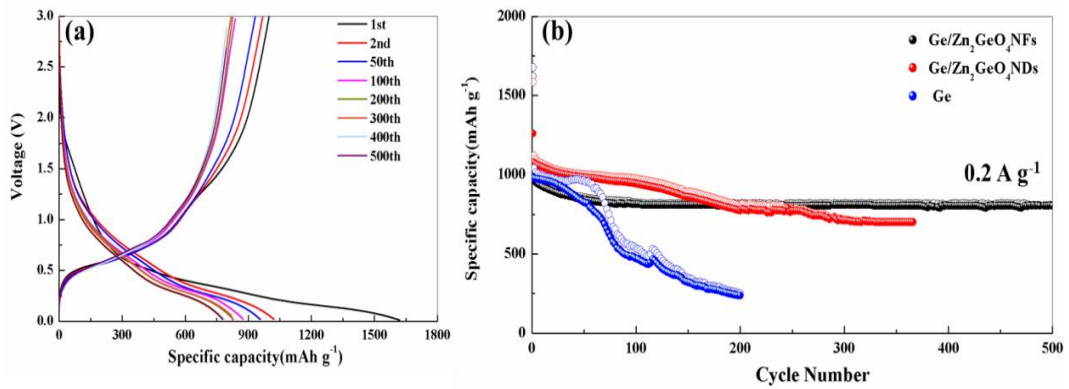

Fig.S5 (a) Galvanostatic charge-discharge profiles for different cycles of Ge/Zn<sub>2</sub>GeO<sub>4</sub>NFs at 0.2 A g<sup>-1</sup>, (b) cycling performance of Ge/Zn<sub>2</sub>GeO<sub>4</sub>NFs, Ge/Zn<sub>2</sub>GeO<sub>4</sub>NDs, and Ge at 0.2 A g<sup>-1</sup>.

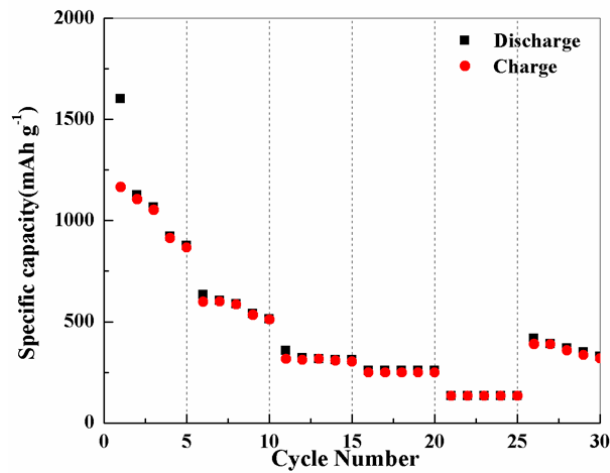

Fig.S6 Rate performance of micron Ge electrode, at current density of 0.2, 0.5, 1.0, 2.0, 5.0 A g<sup>-1</sup>

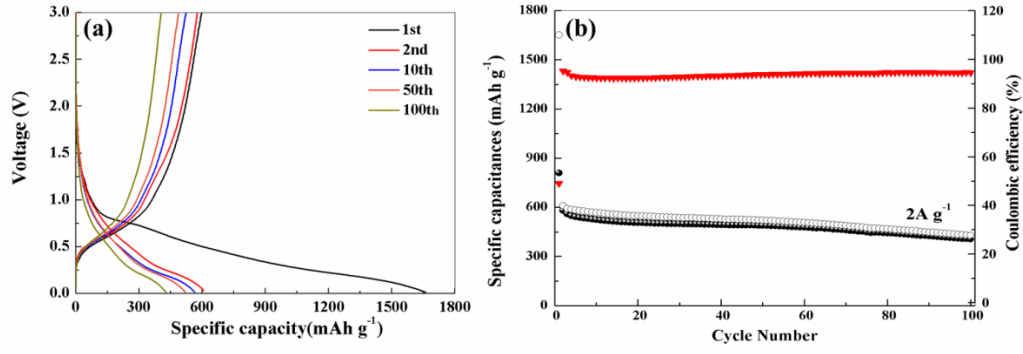

Fig.S7 (a) Galvanostatic charge-discharge profiles for different cycles of Ge/Zn<sub>2</sub>GeO<sub>4</sub>NFs at 2 A g<sup>-1</sup>, (b) cycling performance and Coulombic efficiency of Ge/Zn<sub>2</sub>GeO<sub>4</sub>NFs, at 2 A g<sup>-1</sup>.

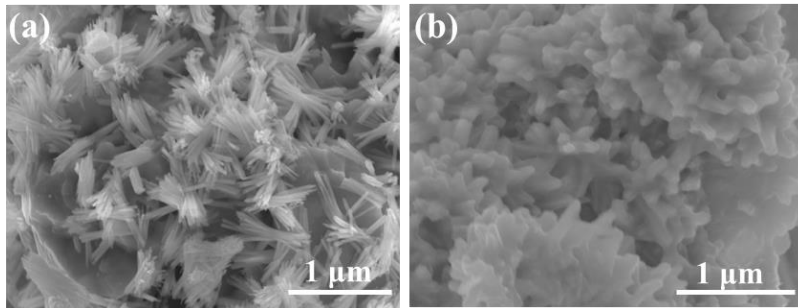

Fig.S8 SEM images of the Ge/Zn<sub>2</sub>GeO<sub>4</sub>NFs anode before cycle (a) and after the 200th cycle (b) at 0.2 A g<sup>-1</sup>.

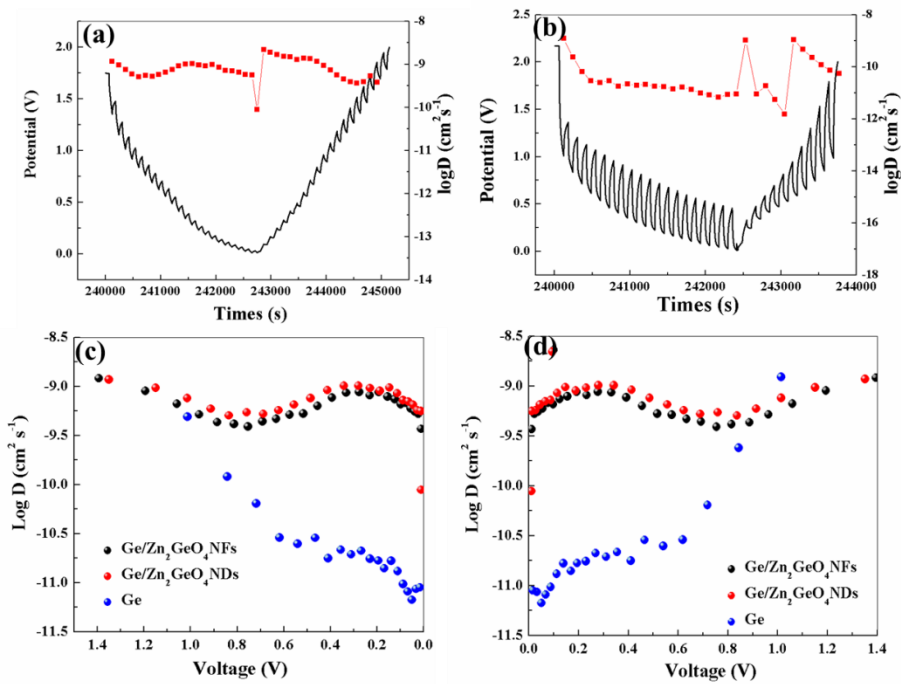

Fig.S9 The GITT curves (voltage vs. time) and (LogD vs. time) for the

Ge/Zn<sub>2</sub>GeO<sub>4</sub>NDs (a), and Ge (b) anode at room temperature 4th cycle, Li<sup>+</sup> ion diffusion coefficients calculated from the GITT potential profiles as a function of depth of discharge (c), and Li<sup>+</sup> ion diffusion coefficients as a function of state of charge (d).

Table S1. The comparison of electrochemical performance of Ge and Zn<sub>2</sub>GeO<sub>4</sub> anodes for LIBs.

| Materials                                                               | Cycling performance (mAh g <sup>-1</sup> )      | Rate capability (mAh g <sup>-1</sup> )                         | Initial Coulomb efficiency (%) | Ref. |
|-------------------------------------------------------------------------|-------------------------------------------------|----------------------------------------------------------------|--------------------------------|------|
| meso-porous Ge anode                                                    | 1291 after 150 cycles at 0.2 C                  | 673 at 10 C                                                    | ~65                            | 1    |
| np-GeSn <sub>5</sub>                                                    | 974 after 500 cycles at 200 mA g <sup>-1</sup>  | 778 at 1500 mA g <sup>-1</sup> ,                               | ~65                            | 2    |
| np-Ge                                                                   | 318 after 150 cycles at 200 mA g <sup>-1</sup>  | 500 at 1000 mA g <sup>-1</sup>                                 |                                | 2    |
| Ag/np-Ge                                                                | 953 after 100 cycles at 100 mA g <sup>-1</sup>  | 522 at 1000 mA g <sup>-1</sup>                                 | 81.8                           | 3    |
| nanoporous Ge (np-Ge)                                                   | 1060 after 100 cycles at 0.2 A g <sup>-1</sup>  | 844.2 at 5 A g <sup>-1</sup>                                   |                                | 4    |
| Ge asymmetric membrane                                                  | 850 after 100 cycles at 600 mA g <sup>-1</sup>  | 840 at 800 mA g <sup>-1</sup>                                  | ~65                            | 5    |
| porous GeO <sub>2</sub> (s)/Ge(c)                                       | 1333.5 after 30 cycles at 0.1 A g <sup>-1</sup> | 1024.4 at 0.4 A g <sup>-1</sup>                                | 60.1                           | 6    |
| Zn <sub>2</sub> GeO <sub>4</sub> amorphous nanoparticles                | 1250 after 500 cycles at 400 mA g <sup>-1</sup> | 610 and 470 at 3.2 A g <sup>-1</sup> and 6.4 A g <sup>-1</sup> | 34                             | 7    |
| Zn <sub>2</sub> GeO <sub>4</sub> nanowires                              | 1220 after 100 cycles,                          |                                                                | 52.5                           | 8    |
| Mn-doped Zn <sub>2</sub> GeO <sub>4</sub> hierarchical nanosheet arrays | 1301 after 100 cycles at 100 mA g <sup>-1</sup> | 500 at 2 A g <sup>-1</sup>                                     | 61.3                           | 9    |
| Zn <sub>2</sub> GeO <sub>4</sub> /RGO composite                         | 1005 after 100 cycles at 0.5 A g <sup>-1</sup>  | 515 at 5 A g <sup>-1</sup>                                     | 63.2                           | 10   |
| Zn <sub>2</sub> GeO <sub>4</sub> ultrathin nanosheets                   | 794 after 500 cycles at 200 mA g <sup>-1</sup>  | 537 at 2 A g <sup>-1</sup>                                     | ~59                            | 11   |

|                                              |                                                     |                            |    |              |
|----------------------------------------------|-----------------------------------------------------|----------------------------|----|--------------|
| Zn <sub>2</sub> GeO <sub>4</sub><br>Nanorods | 616 after 100th cycles at<br>400 mA g <sup>-1</sup> | ~500 at 5C                 | 54 | 12           |
| Ge/Zn <sub>2</sub> GeO <sub>4</sub> NFs      | 816 after 200th cycles at<br>0.2 A g <sup>-1</sup>  | 567 at 2 A g <sup>-1</sup> | 62 | This<br>work |

## References

1. N. Lin, T. Q. Li, Y. Han, Q. L. Zhang, T. J. Xu and Y. T. Qian, *ACS applied materials & interfaces*, 2018, **10**, 8399-8404.
2. Y. H. Yan, Y. Liu, Y. G. Zhang, C. L. Qin, H. Yu, Z. Bakenov and Z. F. Wang, *J Colloid Interf Sci*, 2021, **602**, 563-572.
3. Y. H. Yan, Y. Liu, Y. G. Zhang, C. L. Qin, Z. Bakenov and Z. F. Wang, *J Colloid Interf Sci*, 2021, **592**, 103-115.
4. S. Z. Wang, W. S. Ma, W. F. Yang, Q. G. Bai, H. Gao, Z. Q. Peng and Z. H. Zhang, *J Chem Phys*, 2021, **155**, 184702.
5. I. Byrd, H. Chen, T. Webber, J. L. Li and J. Wu, *Rsc Adv*, 2015, **5**, 92878-92884.
6. S. C. Yan, H. Z. Song, S. R. Lin, H. Wu, Y. Shi and J. Yao, *Advanced Functional Materials*, 2019, **29**, 1807946.
7. R. Yi, J. K. Feng, D. P. Lv, M. L. Gordin, S. R. Chen, D. W. Choi and D. H. Wang, *Nano Energy*, 2013, **2**, 498-504.
8. Y. R. Lim, C. S. Jung, H. S. Im, K. Park, J. Park, W. I. Cho and E. H. Cha, *Journal of Materials Chemistry A*, 2016, **4**, 10691-10699.
9. Q. Li, X. G. Miao, C. X. Wang and L. W. Yin, *Journal of Materials Chemistry A*, 2015, **3**, 21328-21336.
10. Y. Chen, Z. Y. Ji, X. P. Shen, H. Y. Chen, Y. Qi, A. H. Yuan, J. X. Qiu and B. L. Li, *J Colloid Interf Sci*, 2021, **589**, 13-24.
11. G. X. Gao, Y. Xiang, S. Y. Lu, B. T. Dong, S. Chen, L. Shi, Y. K. Wang, H. Wu, Z. Y. Li, A. Abdelkader, K. Xi and S. J. Ding, *Nanoscale*, 2018, **10**, 921-929.
12. J. K. Feng, M. O. Lai and L. Lu, *Electrochem Commun*, 2011, **13**, 287-289.
